# Supplementary material for: Mechanistic stratification in electroactive biofilms of Geobacter sulfurreducens mediated by pilus nanowires
Source: PubMed Central journal article supplement (PMC4974642; doi:10.1038/ncomms12217), 2016-08-02
Supplement: ncomms12217-s1.pdf [file ncomms12217-s1.pdf]

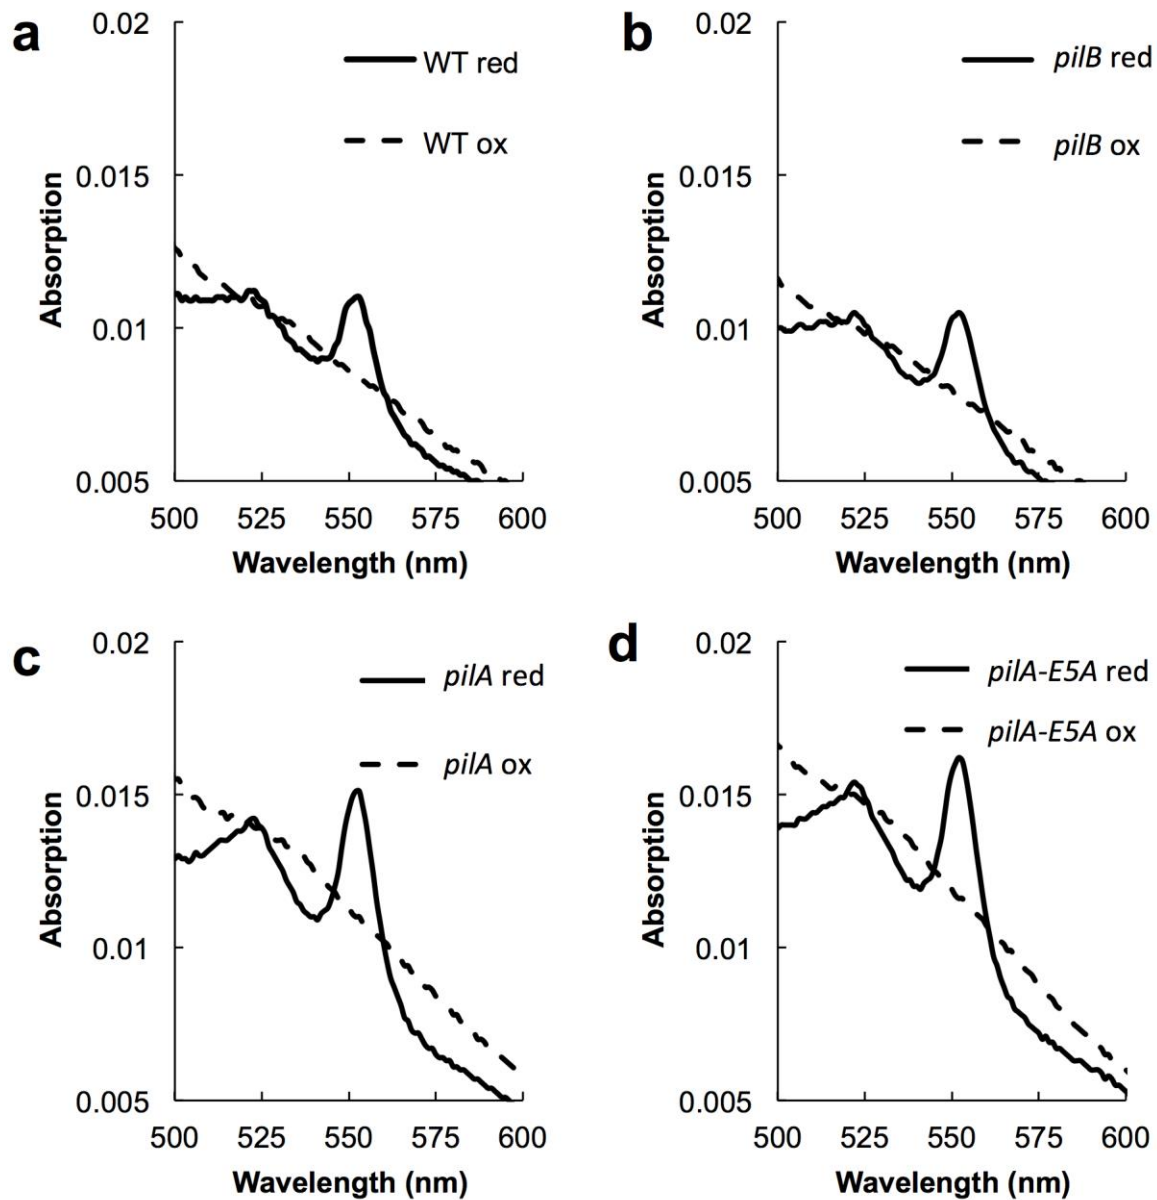

**Supplementary Fig. 1:** Representative absorption spectra of WT (a), *pilB* (b), *pilA* (c), and *pilA-E5A* (d) oxidized (dashed) and dithionite-reduced (solid) biofilm cell extracts, which were used to estimate their cytochrome content.

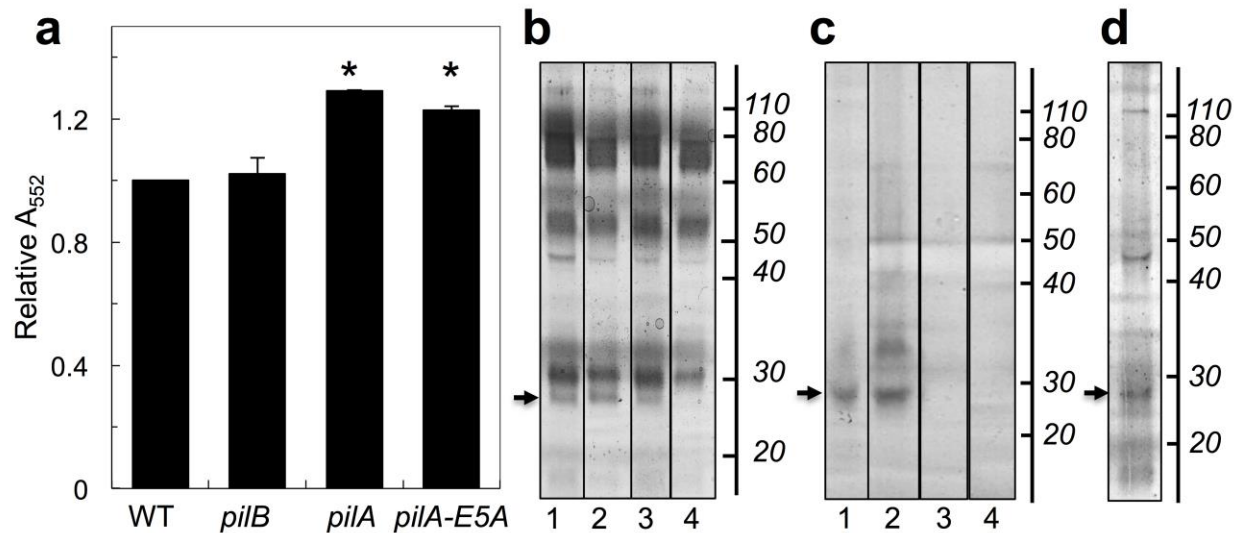

**Supplementary Fig. 2: Cytochrome expression in planktonic cells (a-b) and biofilms (c-d) of the WT and pili-deficient mutants.** (a) Cytochrome content (total cellular heme, measured with the pyridine hemochrome method) of planktonic cells of the pili-deficient strains *pilB*, *pilA*, and *pilA-E5A* relative to the WT. Shown are average and standard error of duplicate samples for each strain. Significant changes relative to the WT values were identified in *t*-test pairwise comparisons and are indicated with a star (\*  $p < 0.05$ ) (b) Heme-stained proteins in whole-cell extracts of planktonic cells of WT (lane 1), *pilB* (lane 2), *pilA*, (lane 3), and *omcZ* (lane 4), which was used as negative control lane for the ~ 30-kDa *OmcZ<sub>S</sub>* band (arrow). (c-d) Heme-stained proteins in the biofilm matrix of the WT, *pilB*, *pilA*, and *pilA-E5A* (lanes 1 to 4, respectively, in panel c), and Tyr3 (panel d). The arrows point at the migration of the *OmcZ<sub>S</sub>* band.

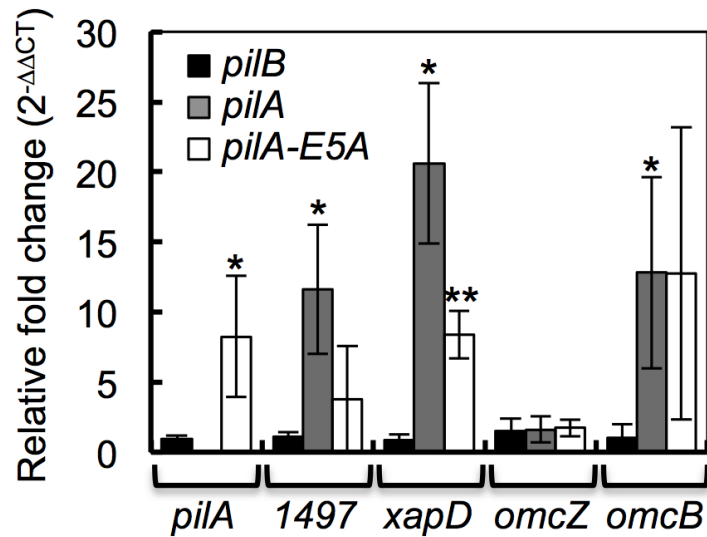

**Supplementary Fig. 3:** Expression of genes in the pilin operon (*pilA* and GSU1497), EPS synthesis (*xapD*), and outer membrane *c*-type cytochromes (*omcZ* and *omcB*) in 48-h old biofilms formed by the pili-deficient strains *pilB* (black), *pilA* (gray) and *pilA-E5A* (white) compared to WT. The constitutive gene *rpoD* was used as internal control. Data shown are average and standard deviation of four replicates. Statistically significant changes relative to the *pilB* values were identified in *t*-test pairwise comparisons and are indicated with one or two stars (\*  $p < 0.05$ ; \*\*  $p < 0.005$ )

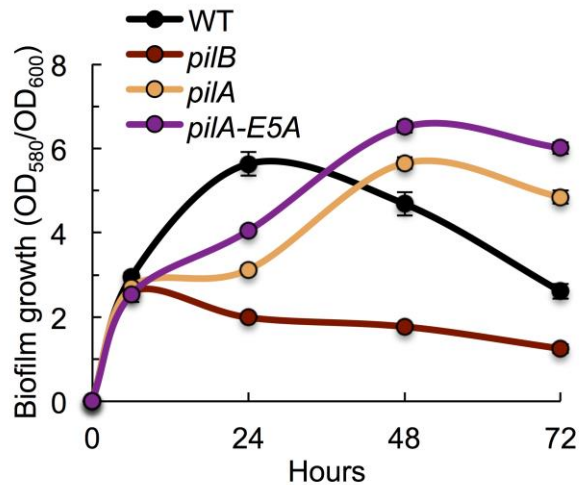

**Supplementary Fig. 4:** Time course biofilm formation assay showing biofilm growth ( $OD_{580}$  of solubilized crystal violet associated with the biofilm normalized by  $OD_{600}$  of the culture) of the WT, *pilB*, *pilA*, and *pilA-E5A*. Each time point shows the average and standard deviation of data collected for six replicate biofilm samples per strain.

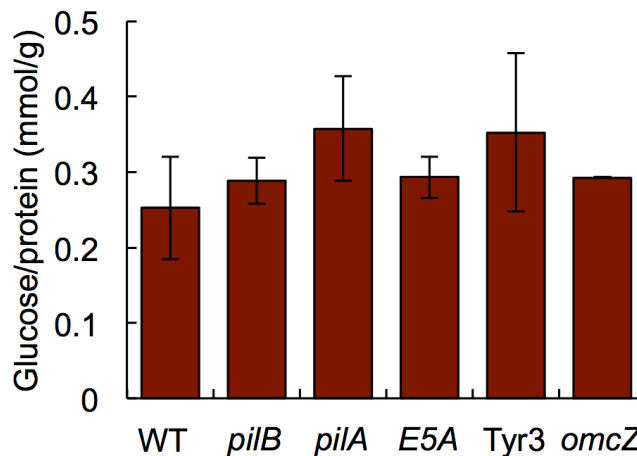

**Supplementary Fig. 5:** EPS content (as glucose equivalents, in mmol, per mg of cell protein) of biofilms of the WT, *pilB*, *pilA*, *pilA-E5A* (E5A), Tyr3, and *omcZ* strains. Shown are average and standard error of two independent experiments, each containing the matrix extracted from 48-h biofilm biomass collected from the wells of two 48-well plates.

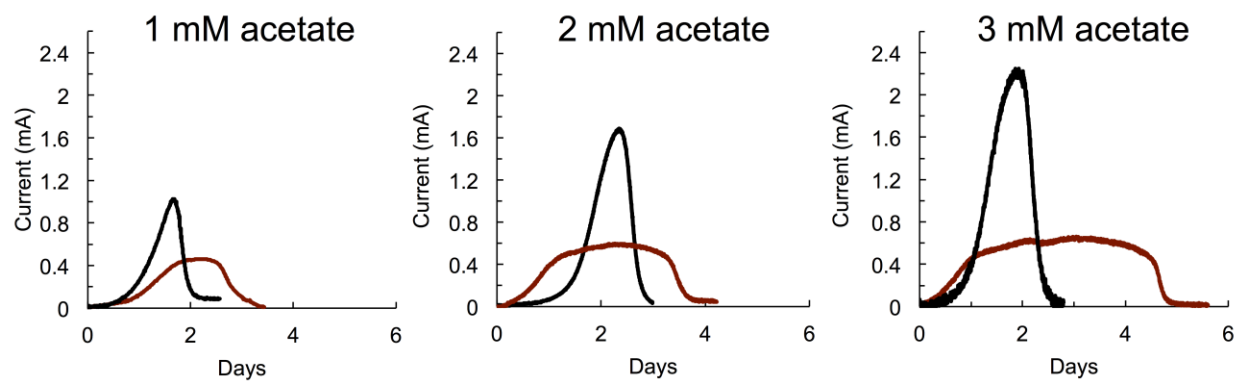

**Supplementary Fig. 6.** Representative plots of current generation by WT (black) and *pilB* (maroon) in MECs operated in batch and fed an initial concentration of 1, 2, or 3 mM acetate.

**Supplementary Table 1.** Strains and plasmids used in this study.

| Bacterial strain or plasmid            | Relevant genotype and properties <sup>a</sup>                                             | Source or reference(s) |
|----------------------------------------|-------------------------------------------------------------------------------------------|------------------------|
| <b><i>Geobacter sulfurreducens</i></b> |                                                                                           |                        |
| WT                                     | Wild type strain PCA                                                                      | 1                      |
| <i>pilA</i>                            | $\Delta pilA::aaaC1$ , Gm <sup>r</sup>                                                    | This study             |
| <i>pilB</i>                            | $\Delta pilB::aaaC1$ , Gm <sup>r</sup>                                                    | This study             |
| <i>omcZ</i>                            | $\Delta omcZ::aaaC1$ , Gm <sup>r</sup>                                                    | This study             |
| <i>pilA-E5A</i>                        | <i>pilA</i> <sup>E5A</sup> :: <i>aadA</i> , Spec <sup>r</sup>                             | This study             |
| $\Delta pilB$                          | $\Delta pilB::loxP$                                                                       | This study             |
| <i>pilB+</i>                           | $\Delta pilB$ complemented with pRG5- <i>pilB</i>                                         | This study             |
| <i>pilB gspE</i>                       | $\Delta pilB$ strain carrying the $\Delta gspE::aaaC1$ mutation, Gm <sup>r</sup>          | This study             |
| <i>pilB mshE</i>                       | $\Delta pilB$ strain carrying the $\Delta mshE::aaaC1$ mutation, Gm <sup>r</sup>          | This study             |
| Tyr3                                   | <i>pilAY27,32,57A::aadA</i> , Spec <sup>r</sup>                                           | This study             |
| <b>Plasmids</b>                        |                                                                                           |                        |
| pCM351                                 | Amp <sup>r</sup> , Tet <sup>r</sup> , Gm <sup>r</sup> , ColE1 <i>ori</i> , <i>oriT</i>    | 2                      |
| pCM158                                 | Km <sup>r</sup> , <i>trfA</i> , <i>oriT</i> , <i>oriV</i> , ColE1 <i>ori</i> , <i>cre</i> | 2                      |
| pCR2.1-TOPO                            | Amp <sup>r</sup> , Km <sup>r</sup> , ColE1 <i>ori</i>                                     | Invitrogen             |
| pRG5                                   | Shuttle vector for <i>G. sulfurreducens</i> Spc <sup>r</sup> , P <sub><i>taclac</i></sub> | 3                      |
| pRG5- <i>pilB</i>                      | pRG5 with <i>G. sulfurreducens pilB</i>                                                   | This study             |

**Supplementary Table 2.** Primers used in this study.

| Primer | Sequence (5'-3')                                  | Amplification          | Use                     |
|--------|---------------------------------------------------|------------------------|-------------------------|
| RS1    | GATCTGGTCGGATAACAACACC                            | <i>pilB</i> upstream   | <i>pilB</i>             |
| RS2    | TTATGCGGCCGCCATATGCATCTGCTA<br>GCCTGCATAGACTCTCC  | <i>pilB</i> upstream   | <i>pilB</i>             |
| RS3    | GTGTTAACCGGTCATATGCAGTGGCTG<br>ACGACTAAACAAAATGCC | <i>pilB</i> downstream | <i>pilB</i>             |
| RS4    | CTCTTGTGAGGATGCAGGTAC                             | <i>pilB</i> downstream | <i>pilB</i>             |
| RS5    | ATGGACCTCGAAGCCTACCT                              | <i>pilA</i> upstream   | <i>pilA</i>             |
| RS6    | TTATGCGGCCGCCATATGCATCTGAAG<br>CATAAGTG           | <i>pilA</i> upstream   | <i>pilA</i>             |
| RS7    | GTGTTAACCGGTCATATGCACGCCCGA<br>AAGTTAA            | <i>pilA</i> downstream | <i>pilA</i>             |
| RS8    | TCCATGCATCATTTTTCGATG                             | <i>pilA</i> downstream | <i>pilA</i>             |
| RS9    | ATATGGCGTTTTACCGCAGAG                             | <i>omcZ</i> upstream   | <i>omcZ</i>             |
| RS10   | TTATGCGGCCGCCATATGCAGCTCCGA<br>AGAAAGTCAAACG      | <i>omcZ</i> upstream   | <i>omcZ</i>             |
| RS11   | GTGTTAACCGGTCATATGCAGATGCGC<br>CAATCAGTACCTT      | <i>omcZ</i> downstream | <i>omcZ</i>             |
| RS12   | CACAGCCAGGTACCATCTGA                              | <i>omcZ</i> downstream | <i>omcZ</i>             |
| RS13   | TTTCTCAGCAATCCATCGAG                              | <i>gspE</i> upstream   | <i>pilB gspE</i>        |
| RS14   | TTATGCGGCCGCCATATGCAATCTGTT<br>CCATGTCGTGTGC      | <i>gspE</i> upstream   | <i>pilB gspE</i>        |
| RS15   | GTGTTAACCGGTCATATGCAGTATGCC<br>GACTTCCGGTAT       | <i>gspE</i> downstream | <i>pilB gspE</i>        |
| RS16   | AGTGATTTTGTCTCCGAATGG                             | <i>gspE</i> downstream | <i>pilB gspE</i>        |
| RS17   | TTTCGGCCATGTACTCCTTT                              | <i>mshE</i> upstream   | <i>pilB mshE</i>        |
| RS18   | TTATGCGGCCGCCATATGCATCCTTGA<br>CGATGCTTTCCAT      | <i>mshE</i> upstream   | <i>pilB mshE</i>        |
| RS19   | GTGTTAACCGGTCATATGCACTCCTCC<br>CTGCACGGTTGA       | <i>mshE</i> downstream | <i>pilB mshE</i>        |
| RS20   | CGACATCTTGTCTCGTGGA                               | <i>mshE</i> downstream | <i>pilB mshE</i>        |
| RS21   | TGCATATGGCGGCCGCATAA                              | <i>aaaC1 loxP</i>      | Excible<br>Gm<br>marker |
| RS22   | TGCATATGACCGGTTAACAC                              | <i>aaaC1 loxP</i>      | Excible<br>Gm<br>marker |
| RS23   | GTGGTGAAGGGGTAGGTTGA                              | <i>pilA</i> upstream   | <i>pilA::aadA</i>       |
| RS24   | GTTAGGCGTCATCCTGTGCTTAACTTT<br>CGGGCGGATAGG       | <i>pilA</i> upstream   | <i>pilA::aadA</i>       |
| RS25   | CAAGCCGACGCCGCTTCTTGATTAAT<br>ACATACTGGAGG        | <i>pilA</i> downstream | <i>pilA</i> -Sp         |
| RS26   | GCGACTTCCACTCGGTACC                               | <i>pilA</i> downstream | <i>pilA</i> -Sp         |
| RS27   | GCACAGGATGACGCCTAAC                               | <i>aadA</i>            | Sp marker               |
| RS28   | GAAGCGGCGTTCGGCTTG                                | <i>aadA</i>            | Sp marker               |
| RS29   | GGTTTCACCCTTATCGCGCTGCTGATC<br>GTCGTT             | <i>pilAE5A::aadA</i>   | <i>pilA-E5A</i>         |
| RS30   | AACGACGATCAGCAGCGCGATAAGGG<br>TGAAACC             | <i>pilAE5A::aadA</i>   | <i>pilA-E5A</i>         |

|      |                                                          |                                |      |
|------|----------------------------------------------------------|--------------------------------|------|
| RS31 | TCCGCAGTTCTCGGCG <u>GCT</u> CGTGTCAA<br>GGCGTAC          | <i>pilA</i> Y27A:: <i>aadA</i> | Tyr3 |
| RS32 | GTACGCCTTGACACGAG <u>CC</u> CGCCGAGA<br>ACTGCGGA         | <i>pilA</i> Y27A:: <i>aadA</i> | Tyr3 |
| RS33 | GTATCGTGTCAAGGCG <u>GCC</u> AACAGCG<br>CGGCGTC           | <i>pilA</i> Y32A:: <i>aadA</i> | Tyr3 |
| RS34 | GACGCCGCGCTGTT <u>GGC</u> CGCCTTGAC<br>ACGATAC           | <i>pilA</i> Y32A:: <i>aadA</i> | Tyr3 |
| RS35 | CCGCATTTGCTGATGATCAAACC <u>GCTC</u><br>CGCCCGAAAGTTAA    | <i>pilA</i> Y57A:: <i>aadA</i> | Tyr3 |
| RS36 | TTAACTTTTCGGGCGGAG <u>CC</u> GGTTTGATC<br>ATCAGCAAATGCGG | <i>pilA</i> Y57A:: <i>aadA</i> | Tyr3 |
| RS37 | CCAACACAAGCAGCAAAAAG                                     | <i>pilA</i>                    | qPCR |
| RS38 | GCAGCGAGAATACCGATGAT                                     | <i>pilA</i>                    | qPCR |
| RS39 | ATGGGTGGCAAGGACTTTAC                                     | GSU1497                        | qPCR |
| RS40 | ACACCCGGTTACCAGAAGAG                                     | GSU1497                        | qPCR |
| RS41 | GTCCAACAAAGGGAAGTCT                                      | <i>xapD</i>                    | qPCR |
| RS42 | CCTCCGCAGAGAGGTAATCA                                     | <i>xapD</i>                    | qPCR |
| RS43 | CACGAGCCTGACACTCACTC                                     | <i>omcZ</i>                    | qPCR |
| RS44 | AAGGTTGCTGACCTTGTTGG                                     | <i>omcZ</i>                    | qPCR |
| RS45 | GACACGGTCAACCAGAACAA                                     | <i>omcB</i>                    | qPCR |
| RS46 | GGTCCAGTTTACGACAGGA                                      | <i>omcB</i>                    | qPCR |
| RS47 | AGTTCTCGACGTACGCCACT                                     | <i>rpoD</i>                    | qPCR |
| RS48 | TCAGCTTGTTGATGGTCTCG                                     | <i>rpoD</i>                    | qPCR |

## Supplementary References

- 1 Caccavo, F., Jr. *et al.* *Geobacter sulfurreducens* sp. nov., a hydrogen- and acetate-oxidizing dissimilatory metal-reducing microorganism. *Appl. Environ. Microbiol.* **60**, 3752-3759 (1994).
- 2 Marx, C. J. & Lidstrom, M. E. Broad-host-range *cre-lox* system for antibiotic marker recycling in gram-negative bacteria. *Biotechniques* **33**, 1062-1067 (2002).
- 3 Kim, B. C. *et al.* OmcF, a putative *c*-type monoheme outer membrane cytochrome required for the expression of other outer membrane cytochromes in *Geobacter sulfurreducens*. *J. Bacteriol.* **187**, 4505-4513 (2005).
